# Supplementary material for: Bacteria-specific pro-photosensitizer kills multidrug-resistant Staphylococcus aureus and Pseudomonas aeruginosa
Source: PubMed Central journal article supplement (PMC7994569; doi:10.1038/s42003-021-01956-y), 2021-03-25
Supplement: 42003_2021_1956_MOESM2_ESM.pdf [file 42003_2021_1956_MOESM2_ESM.pdf]

## Description of Additional Supplementary Files

**File name:** Supplementary Data

**Description:** Raw data underlying Fig. 1b, Fig. 1c, Fig. 2, Fig. 3b-3i, Fig. 4b-4g, 5a5c, Fig. 5e, Fig. 6d, Fig. 6g, and Fig. 6h.
